# Supplementary material
Source: PubMed Central journal article supplement (PMC8428979)
Supplement: NIHMS1731889-supplement-Appendix_A_-_Survey.pdf [file NIHMS1731889-supplement-Appendix_A_-_Survey.pdf]

# Trauma Video Review Utilization Survey

We are conducting an electronic survey investigating the use of trauma video review (TVR) technology at trauma centers across the United States. TVR is any recording technology that is used to capture and record trauma resuscitations. The purpose of this study is to quantify centers that have active TVR programs, have had one in the past, or plan to develop a program in the future.

Completion of this survey constitutes consent to be involved in this study.

---

What level designation does your trauma center have?

- I
- II
- III
- IV
- None

In which state is the trauma center you are currently employed at located?

- Alaska AK
- Alabama AL
- Arkansas, AR
- Arizona, AZ
- California CA
- Colorado CO
- Connecticut CT
- Delaware DE
- Florida FL
- Georgia GA
- Hawaii HI
- Idaho ID
- Illinois IL
- Indiana IN
- Iowa IA
- Kansas KS
- Kentucky KY
- Louisiana LA
- Maine ME
- Maryland MD
- Massachusetts MA
- Michigan MI
- Minnesota MN
- Mississippi MS
- Missouri MO
- Montana MT
- Nebraska NE
- Nevada NV
- New Hampshire NH
- New Jersey NJ
- New Mexico NM
- New York NY
- North Carolina NC
- North Dakota ND
- Ohio OH
- Oklahoma OK
- Oregon OR
- Pennsylvania PA
- Rhode Island RI
- South Carolina SC
- South Dakota SD
- Tennessee TN
- Texas TX
- Utah UT
- Vermont VT
- Virginia VA
- Washington WA
- West Virginia WV
- Wisconsin WI
- Wyoming WY
- Washington D.C.

Alaska Trauma Centers

- Alaska\_Native\_Medical\_Center
- Providence\_Alaska\_Medical\_Center

Trauma Center

- Baptist\_Medical\_Center\_South
- Huntsville\_Hospital
- Northeast\_Alabama\_Regional\_Medical\_Center
- Southeast\_Alabama\_Medical\_Center
- University\_of\_Alabama\_at\_Birmingham\_Hospital\_UAB
- University\_of\_South\_Alabama\_Medical\_Center

---

Trauma Center

- Baptist\_Health\_Medical\_Center
- CHI\_St\_Vincent\_Hospital\_Hot\_Springs
- CHI\_St\_Vincent\_Infirmiry\_
- 

- f\_Arkansas\_for\_Medical\_Sciences\_UAMS\_Medical\_Center
- Washington\_Regional\_Medical\_Center

---

Trauma Center

- Abrazo\_West\_Campus
- Banner\_University\_Medical\_Center\_Tucson
- Banner\_Desert\_Medical\_Center
- Banner\_University\_Medical\_Center\_Phoenix
- Dignity\_Health\_Chandler\_Regional\_Medical\_Center
- 

- gnity\_Health\_St\_Josephs\_Hospital\_and\_Medical\_Center
- Flagstaff\_Medical\_Center
- HonorHealth\_John\_C\_Lincoln\_Medical\_Center
- HonorHealth\_Scottsdale\_Osborn\_Medical\_Center
- Maricopa\_Integrated\_Health\_Center
-

Trauma Center

- Antelope\_Valley\_Hospital
- Arrowhead\_Regional\_Medical\_Center
- California\_Hospital\_Medical\_Center
- Cedars\_Sinai\_Medical\_Center
- Community\_Regional\_Medical\_Center
- Desert\_Regional\_Medical\_Center
- Dignity\_Health\_Northridge\_Hospital\_Medical\_Center
- Doctors\_Medical\_Center
- Eden\_Medical\_Center
- Enloe\_Medical\_Center
- 

- University\_of\_California\_at\_Los\_Angeles\_Medical\_Center
- Henry\_Mayo\_Newhall\_Memorial\_Hospital
- Highland\_Hospital\_Alameda\_Health
- Huntington\_Memorial\_Hospital
- Inland\_Valley\_Medical\_Center
- John\_Muir\_Medical\_Center
- Kaiser\_Permanente\_South\_Sacramento
- Kaiser\_Permanente\_Vacaville\_Medical\_Center
- Kern\_Medical\_Center
- 
- AC\_University\_of\_Southern\_California\_Medical\_Center
- Loma\_Linda\_University\_Medical\_Center
- Long\_Beach\_Memorial\_Medical\_Center
- Los\_Robles\_Hospital\_Medical\_Center
- Memorial\_Medical\_Center\_Modesto
- Mercy\_Medical\_Center\_Redding
- Mercy\_San\_Juan\_Medical\_Center
- Mission\_Hospital\_Regional\_Medical\_Center
- Natividad\_Medical\_Center
- North\_Bay\_Medical\_Center
- Orange\_County\_Global\_Medical\_Center
- Palomar\_Medical\_Center
- Pomona\_Valley\_Hospital\_Medical\_Center
- Providence\_Holy\_Cross\_Medical\_Center
- Regional\_Medical\_Center\_of\_San\_Jose
- Riverside\_Community\_Hospital
- Riverside\_University\_Health\_System\_Medical\_Center
- 

- University\_of\_California\_Los\_Angeles\_Medical\_Center
- Saint\_Francis\_Medical\_Center
- Santa\_Barbara\_Cottage\_Hospital
- Santa\_Clara\_Valley\_Medical\_Center
- Santa\_Rosa\_Memorial\_Hospital\_Montgomery
- Scripps\_Memorial\_Hospital\_La\_Jolla
- Scripps\_Mercy\_Hospital
- Sharp\_Memorial\_Hospital
- St\_Francis\_Medical\_Center

- St\_Mary\_Medical\_Center\_Long\_Beach
- Stanford\_Health\_Care
- Sutter\_Roseville\_Medical\_Center
- University\_of\_California\_San\_Diego\_Health\_System
- University\_of\_California\_Davis\_Medical\_Center
- University\_of\_California\_Irvine\_Medical\_Center
- Ventura\_County\_Medical\_Center
- 

rg\_San\_Francisco\_General\_Hospital\_and\_Trauma\_Center

---

Trauma Center

- Boulder\_Community\_Hospital
- Denver\_Health\_Medical\_Center
- Good\_Samaritan\_Medical\_Center
- Littleton\_Adventist\_Hospital
- Medical\_Center\_of\_Aurora
- Medical\_Center\_of\_the\_Rockies
- 

- rial\_Hospital\_Central\_University\_of\_Colorado\_Health
- North\_Colorado\_Medical\_Center
- Parker\_Adventist\_Hospital
- Parkview\_Medical\_Center
- Penrose\_Hospital
- Sky\_Ridge\_Medical\_Center
- St\_Anthony\_Hospital
- 

- Hospital\_and\_Regional\_Medical\_Center\_Grand\_Junction
- Swedish\_Medical\_Center
- University\_of\_Colorado\_Hospital

---

Trauma Center

- Bridgeport\_Hospital
- Danbury\_Hospital
- Hartford\_Hospital
- Norwalk\_Hospital
- Saint\_Francis\_Hospital\_and\_Medical\_Center
- Saint\_Marys\_Hospital
- Saint\_Vincent's\_Medical\_Center
- Stamford\_Hospital
- Waterbury\_Hospital
- Yale\_New\_Haven\_Hospital
- Yale\_New\_Haven\_Hospital\_Saint\_Raphael\_Campus

---

Trauma Center

- Christiana\_Care\_Health\_System

---

Trauma Center

- Aventura\_Hospital\_and\_Medical\_Center
- Baptist\_Hospital
- Bay\_Medical\_Center\_Sacred\_Heart
- Bayfront\_Medical\_Center\_St\_Petersburg
- Blake\_Medical\_Center
- Broward\_Health\_Medical\_Center
- Broward\_Health\_North
- Central\_Florida\_Regional\_Hospital
- Delray\_Medical\_Center
- Fort\_Walton\_Beach\_Medical\_Center
- Halifax\_Health\_Medical\_Center\_of\_Daytona\_Beach
- Holmes\_Regional\_Medical\_Center
- Jackson\_Memorial\_Hospital\_Ryder\_Trauma\_Center
- Jackson\_South\_Medical\_Center
- Kendall\_Regional\_Medical\_Center
- Lakeland\_Regional\_Medical\_Center
- Lawnwood\_Regional\_Medical\_Center
- Lee\_Memorial\_Hospital
- Memorial\_Hospital\_Jacksonville
- Memorial\_Regional\_Hospital
- Ocala\_Regional\_Medical\_Center
- Orange\_Park\_Medical\_Center
- Orlando\_Regional\_Medical\_Center
- Osceola\_Regional\_Medical\_Center
- Regional\_Medical\_Center\_Bayonet\_Point
- Sacred\_Heart\_Hospital
- Sarasota\_Memorial\_Hospital
- St\_Josephs\_Hospital
- St\_Marys\_Medical\_Center
- Tallahassee\_Memorial\_HealthCare
- Tampa\_General\_Hospital
- UF\_Health\_Shands\_Gainesville\_Hospital
- UF\_Health\_Shands\_Jacksonville
- 

---

Trauma Center

- Augusta\_University\_Medical\_Center
- Floyd\_Medical\_Center
- Grady\_Memorial\_Hospital
- Gwinnett\_Medical\_Center
- Hamilton\_Medical\_Center
- John\_D\_Archbold\_Memorial\_Hospital
- Medtown\_Medical\_Center
- Memorial\_University\_Medical\_Center
- Navicent\_Health\_Medical\_Center
- Northeast\_Georgia\_Medical\_Center
- Piedmont\_Athens\_Regional\_Medical\_Center
- WellStar\_Atlanta\_Medical\_Center
- WellStar\_Kennestone\_Hospital
- WellStar\_North\_Fulton\_Hospital
- 

---

Trauma Center

- Queens\_Medical\_Center
- 

---

Trauma Center

- Genesis\_Medical\_Center\_Davenport
- Mercy\_Medical\_Center\_North\_Iowa
- Mercy\_Medical\_Center\_Sioux\_City
- Mercy\_Medical\_Center\_Des\_Moines
- UnityPoint\_Health\_Iowa\_Methodist\_Medical\_Center
- University\_of\_Iowa\_Hospitals\_and\_Clinics

---

Trauma Center

- Eastern\_Idaho\_Regional\_Medical\_Center
- Portneuf\_Medical\_Center
- Saint\_Alphonsus\_Regional\_Medical\_Center

## Trauma Center

- Adventist\_Bolingbrook\_Hospital
- Adventist\_Glen\_Oaks\_Hospital
- Adventist\_Hinsdale\_Hospital
- Adventist\_La\_Grange\_Memorial\_Hospital
- Advocate\_BroMenn\_Medical\_Center
- Advocate\_Christ\_Medical\_Center
- Advocate\_Condell\_Medical\_Center
- Advocate\_Good\_Samaritan\_Hospital
- Advocate\_Good\_Shepherd\_Hospital
- Advocate\_Illinois\_Masonic\_Medical\_Center
- Advocate\_Lutheran\_General\_Hospital
- Advocate\_Sherman\_Hospital
- Alexian\_Brothers\_Medical\_Center
- Blessing\_Hospital
- Carle\_Foundation\_Hospital
- Centegra\_Hospital\_Huntley
- Centegra\_Hospital\_McHenry
- Central\_DuPage\_Hospital
- Decatur\_Memorial\_Hospital
- Delnor\_Hospital
- Edward\_Hospital
- Elmhurst\_Memorial\_Hospital
- Galesburg\_Cottage\_Hospital
- Illini\_Campus
- John\_H\_Stroger\_Jr.\_Hospital\_of\_Cook\_County
- Loyola\_Health\_System\_Gottlieb
- Loyola\_University\_Medical\_Center
- MacNeal\_Hospital
- Memorial\_Medical\_Center\_Springfield
- Morris\_Hospital\_Healthcare\_Centers
- Mount\_Sinai\_Hospital
- NorthShore\_Glenbrook\_Hospital
- NorthShore\_Highland\_Park\_Hospital
- NorthShore\_Skokie\_Hospital
- 
- NorthShore\_University\_Health\_System\_Evanston\_Hospital
- Northwest\_Community\_Hospital
- Northwestern\_Lake\_Forest\_Hospital
- Northwestern\_Memorial\_Hospital
- OSF\_Saint\_Anthony\_Medical\_Center
- OSF\_Saint\_Francis\_Medical\_Center
- OSF\_St\_Joseph\_Medical\_Center
- OSF\_St\_Mary\_Medical\_Center
- Presence\_Mercy\_Medical\_Center
- Presence\_Saint\_Francis\_Hospital
- Presence\_Saint\_Joseph\_Hospital
- Presence\_Saint\_Joseph\_Medical\_Center
- Presence\_St\_Marys\_Hospital
- Riverside\_Medical\_Center
- Rockford\_Memorial\_Hospital
- Rush\_Copley\_Medical\_Center
- Silver\_Cross\_Hospital
- St\_Alexius\_Medical\_Center
- St\_John\_Hospital
- SwedishAmerican\_Health\_System
- UnityPoint\_Health\_Methodist
- UnityPoint\_Health\_Trinity\_Rock\_Island



---

Trauma Center

- Deaconess\_Hospital
- Eskenazi\_Health
- Indiana\_University\_Health\_Methodist\_Hospital
- Lutheran\_Hospital\_of\_Indiana
- Memorial\_Hospital\_of\_South\_Bend
- Parkview\_Regional\_Medical\_Center
- St\_Vincent\_Evansville
- St\_Vincent\_Indianapolis\_Hospital
- Terre\_Haute\_Regional

---

Trauma Center

- Overland\_Park\_Regional\_Medical\_Center
- Stormont\_Vail\_HealthCare
- The\_University\_of\_Kansas\_Hospital
- Via\_Christi\_Hospital\_on\_St\_Francis
- Wesley\_Medical\_Center
- 

---

Trauma Center

- Pikeville\_Medical\_Center
- University\_of\_Kentucky\_Albert\_B\_Chandler\_Hospital
- University\_of\_Louisville\_Hospital

---

Trauma Center

- North\_Oaks\_Medical\_Center
- Our\_Lady\_of\_the\_Lake\_Regional\_Medical\_Center
- Rapides\_Regional\_Medical\_Center
- University\_Health\_Shreveport
- University\_Medical\_Center\_New\_Orleans
- 

---

Trauma Center

- Baystate\_Medical\_Center\_Baystate\_Health
- Beth\_Israel\_Deaconess\_Medical\_Center
- Boston\_Medical\_Center
- Brigham\_and\_Womens\_Hospital
- Lahey\_Hospital\_and\_Medical\_Clinic
- Massachusetts\_General\_Hospital
- South\_Shore\_Hospital
- Tufts\_Medical\_Center
- UMass\_Memorial\_Medical\_Center

---

Trauma Center

- Johns\_Hopkins\_Bayview\_Medical\_Center
- Johns\_Hopkins\_Hospital
- Prince\_Georges\_Hospital\_Center
- Sinai\_Hospital\_of\_Baltimore
- Suburban\_Hospital\_Johns\_Hopkins
- 

- d\_Medical\_Center\_R\_Adams\_Cowley\_Shock\_Trauma\_Cen
- Walter\_Reed\_National\_Military\_Medical\_Center

---

Trauma Center

- Central\_Maine\_Medical\_Center
- Eastern\_Maine\_Medical\_Center
- Maine\_Medical\_Center

---

Trauma Center

- Ascension\_Providence\_Hospital\_Southfield
- Ascension\_St\_Marys\_of\_Michigan
- Beaumont\_Hospita\_Dearborn
- Beaumont\_Hospital\_Farmington\_Hills\_
- Beaumont\_Hospital\_Royal\_Oak
- Beaumont\_Hospital\_Trenton
- Beaumont\_Hospital\_Troy
- Borgess\_Medical\_Center
- Bronson\_Methodist\_Hospital
- Covenant\_Healthcare
- Detroit\_Medical\_Center\_Sinai\_Grace\_Hospital
- Detroit\_Receiving\_Hospital
- Genesys\_Regional\_Medical\_Center
- Henry\_Ford\_Allegiance\_Health
- Henry\_Ford\_Hospital
- Henry\_Ford\_Macomb\_Hospital\_Clinton\_Township
- Hurley\_Medical\_Center
- McLaren\_Lapeer\_Region
- McLaren\_Macomb\_
- McLaren\_Oakland\_
- Mercy\_Health\_Muskegon\_Hackley\_Campus
- Mercy\_Health\_Saint\_Marys\_Health\_Care\_Grand\_Rapids
- MidMichigan\_Medical\_Center\_Midland
- Munson\_Medical\_Center
- Providence\_Park\_Hospital
- Sinai\_Grace\_Hospital
- Sparrow\_Hospital
- Spectrum\_Health\_Butterworth\_Hospital
- St\_John\_Hospital\_and\_Medical\_Center
- St\_Joseph\_Mercy\_Hospital\_Ann\_Arbor
- St\_Joseph\_Mercy\_Oakland
- St\_Mary\_Mercy\_Hospital
- St\_Marys\_of\_Michigan
- University\_of\_Michigan\_Hospitals\_and\_Health\_Centers
- UP\_Health\_System\_Marquette

---

Trauma Center

- CentraCare\_St\_Cloud\_Hospital
- Essentia\_Health\_St\_Marys\_Medical\_Center
- Hennepin\_County\_Medical\_Center
- Mayo\_Clinic\_Hospital\_Saint\_Marys\_Campus
- Mercy\_Hospital
- North\_Memorial\_Medical\_Center
- Regions\_Hospital
- St\_Lukes\_Hospital\_
- University\_of\_Minnesota\_Medical\_Center\_Fairview

---

Trauma Center

- Barnes\_Jewish\_Hospital
- Centerpoint\_Medical\_Center
- Cox\_Medical\_Center\_Branson
- Cox\_Medical\_Centers\_South\_Hospital
- Freeman\_Health\_System\_West
- Hermann\_Area\_District\_Hospital
- Liberty\_Hospital
- Mercy\_Hospital\_Joplin
- Mercy\_Hospital\_Springfield
- Mercy\_Hospital\_St.\_Louis
- Mosaic\_Life\_Care\_at\_St.\_Joseph
- North\_Kansas\_City\_Hospital
- Research\_Medical\_Center
- SSM\_DePaul\_Health\_Center
- SSM\_Health\_Saint\_Louis\_University\_Hospital
- SSM\_St.\_Joseph\_Health\_Center
- St.\_Anthonys\_Medical\_Center
- St.\_Lukes\_Hospital\_of\_Kansas\_City
- Truman\_Medical\_Centers\_Hospital\_Hill
- University\_of\_Missouri\_Health\_System

---

Trauma Center

- Forrest\_General\_Hospital
- Memorial\_Hospital\_at\_Gulfport
- North\_Mississippi\_Medical\_Center\_Tupelo
- University\_of\_Mississippi\_Medical\_Center

---

Trauma Center

- Benefis\_Hospitals
- Billings\_Clinic
- Providence\_Health\_and\_Services\_St\_Patrick\_Hospital
- St\_Vincent\_Healthcare

---

Trauma Center

- Carolinas\_Medical\_Center
- Cone\_Health\_Moses\_Cone\_Hospital\_Campus
- Duke\_University\_Hospital
- Mission\_Hospital
- New\_Hanover\_Regional\_Medical\_Center
- North\_Carolina\_Baptist\_Medical\_Center
- University\_of\_North\_Carolina\_Hospitals
- Vidant\_Medical\_Center
- WakeMed\_Raleigh\_Campus
- 

---

Trauma Center

- Altru\_Health\_System
- CHI\_St\_Alexius\_Health
- Essentia\_Health\_Fargo
- Sanford\_Medical\_Center
- Sanford\_Medical\_Center\_Fargo
- Trinity\_Hospital

---

Trauma Center

- Bryan\_Medical\_Center
- CHI\_Health\_Creighton\_University\_Medical\_Center
- CHI\_Health\_Good\_Samaritan
- Nebraska\_Medicin\_Nebraska\_Medical\_Center
- Regional\_West\_Medical\_Center

---

Trauma Center

- Concord\_Hospital
- Dartmouth\_Hitchcock\_Medical\_Center
- Portsmouth\_Regional

---

Trauma Center

- AtlantiCare\_Regional\_Medical\_Center
- Capital\_Health\_Regional\_Medical\_Center
- Cooper\_University\_Health\_Care
- 

- idian\_Health\_Jersey\_Shore\_University\_Medical\_Center
- Hackensack\_University\_Medical\_Center
- Jersey\_City\_Medical\_Center\_RWJ\_Barnabas\_Health
- Morristown\_Medical\_Center
- New\_Jersey\_Trauma\_Center\_at\_the\_University\_Hospital
- Robert\_Wood\_Johnson\_University\_Hospital
- St\_Josephs\_Regional\_Medical\_Center

---

Trauma Center

- University\_of\_New\_Mexico\_Hospital

---

Trauma Center

- Renown\_Regional\_Medical\_Center
- Sunrise\_Hospital\_Medical\_Center
- University\_Medical\_Center\_of\_Southern\_NV

## Trauma Center

- Albany\_Medical\_Center
- Bassett\_Medical\_Center
- Bellevue\_Hospital\_Center
- Brookdale\_University\_Hospital\_and\_Medical\_Center
- Brookhaven\_Memorial\_Hospital\_Medical\_Center
- Champlain\_Valley\_Physicians\_Hospital\_
- Erie\_County\_Medical\_Center
- Good\_Samaritan\_Hospital
- Jacobi\_Medical\_Center
- Jamaica\_Hospital\_Medical\_Center
- Kings\_County\_Hospital\_Center
- Lincoln\_Medical\_and\_Mental\_Health\_Center
- Maimonides\_Medical\_Center
- 

- Westchester\_Regional\_Hospital\_of\_Westchester\_Medical\_Center
- Mount\_Sinai\_St.\_Lukes\_Hospital\_
- Nassau\_University\_Medical\_Center
- New\_York\_Presbyterian\_Weill\_Cornell\_Medical\_Center
- New\_York\_Presbyterian\_Brooklyn\_Methodist\_Hospital
- New\_York\_Presbyterian\_Queens
- Northwell\_Health\_North\_Shore\_University\_Hospital
- Northwell\_Health\_Southside\_Hospital
- Nyack\_Hospital
- NYU\_Lutheran\_Medical\_Center
- Orange\_Regional\_Medical\_Center
- Richmond\_University\_Medical\_Center
- South\_Nassau\_Communities\_Hospital
- St\_Barnabas\_Hospital
- Staten\_Island\_University\_Hospital
- Stony\_Brook\_University\_Medical\_Center
- UHS\_Wilson\_Medical\_Center
- 

- Westchester\_Regional\_Hospital\_of\_Westchester\_Medical\_Center
- f\_Rochester\_Medical\_Center\_Strong\_Memorial\_Hospital
- Upstate\_University\_Hospital
- Vassar\_Brothers\_Medical\_Center
- Westchester\_Medical\_Center
- Winthrop\_University\_Hospital

---

Trauma Center

- Aultman\_Hospital
- Cleveland\_Clinic\_Akron\_General
- Cleveland\_Clinic\_Hillcrest\_Hospital
- Fairview\_Hospital
- Kettering\_Medical\_Center
- Lakewood\_Hospital
- Lima\_Memorial\_Health\_System
- Mercy\_Health\_St\_Elizabeth\_Youngstown\_Hospital
- Mercy\_Health\_St\_Vincent\_Medical\_Center
- Mercy\_Medical\_Cente\_Cranton
- MetroHealth\_Medical\_Center
- Miami\_Valley\_Hospital
- Mount\_Carmel\_West\_Hospital
- OhioHealth\_Grant\_Medical\_Center
- OhioHealth\_Riverside\_Methodist\_Hospital
- ProMedica\_Toledo\_Hospital
- St.\_Ritas\_Medical\_Center
- Summa\_Akron\_City\_Hospital
- The\_Ohio\_State\_University\_Wexner\_Medical\_Center
- The\_University\_of\_Toledo\_Medical\_Center
- University\_Hospitals\_Cleveland\_Medical\_Center
- University\_of\_Cincinnati\_Medical\_Center
- 

---

Trauma Center

- OU\_Medical\_Center
- Saint\_Francis\_Hospital
- St\_John\_Medical\_Center

---

Trauma Center

- Good\_Samaritan\_Regional\_Medical\_Center
- Legacy\_Emanuel\_Medical\_Center
- Oregon\_Health\_and\_Sciences\_University\_Hospital
- Sacred\_Heart\_Medical\_Center\_at\_RiverBend
- Salem\_Hospital
- St\_Charles\_Bend

---

 Trauma Center

- Abington\_Memorial\_Hospital
- Allegheny\_General\_Hospital
- Aria\_Health
- Conemaugh\_Memorial\_Medical\_Center
- Crozer\_Chester\_Medical\_Center
- Einstein\_Medical\_Center\_Philadelphia
- Forbes\_Regional\_Hospital
- Geisinger\_Community\_Medical\_Center
- Geisinger\_Medical\_Center
- Geisinger\_Wyoming\_Valley\_Medical\_Center
- Guthrie\_Robert\_Packer\_Hospital
- Hahnemann\_University\_Hospital
- Lancaster\_General\_Health
- Lankenau\_Medical\_Center
- Lehigh\_Valley\_Hospital\_Network\_Cedar\_Crest
- Paoli\_Hospital
- Penn\_Presbyterian\_Medical\_Center
- Penn\_State\_Milton\_S\_Hershey\_Medical\_Center
- Reading\_Hospital
- St\_Lukes\_University\_Health\_Network
- St\_Mary\_Medical\_Center
- Temple\_University\_Hospital
- Thomas\_Jefferson\_University\_Hospital
- UPMC\_Altoona
- UPMC\_Hamot
- UPMC\_Mercy
- UPMC\_Presbyterian\_Shadyside
- WellSpan\_York\_Hospital

---

 Trauma Center

- Rhode\_Island\_Hospital

---

 Trauma Center

- Anmed\_Health\_Medical\_Center
- Grand\_Strand\_Regional\_Medical\_Center
- Greenville\_Memorial\_Hospital
- 
- Medical\_Center\_of\_Medical\_University\_of\_South\_Carolina
- Palmetto\_Health\_Richland
- Spartanburg\_Medical\_Center
- Trident\_Medical\_Center

---

 Trauma Center

- Avera\_McKenna\_Hospital\_University\_Health\_Center
- Rapid\_City\_Regional\_Health
- Sanford\_USD\_Medical\_Center\_Sioux\_Valley\_Hospital

---

 Trauma Center

- Erlanger\_Medical\_Center
- Johnson\_City\_Medical\_Center
- Regional\_One\_Health
- Tristar\_Skyline\_Medical\_Center
- University\_of\_Tennessee\_Medical\_Center
- Vanderbilt\_Hospital\_and\_Clinics
- Wellmont\_Bristol\_Regional\_Medical\_Center
- Wellmont\_Holston\_Valley\_Medical\_Center



---

Trauma Center

- Baylor\_Regional\_Medical\_Center\_at\_Grapevine
- Baylor\_Scott\_White\_Hillcrest\_Medical\_Center
- Baylor\_University\_Medical\_Center
- Ben\_Taub\_Hospital\_Harris\_Health\_System
- Brooke\_Army\_Medical\_Center
- CHI\_St\_Joseph\_Health
- 

- US\_Spohn\_Hospital\_Corpus\_Christi\_Memorial\_Shoreline
- CHRISTUS\_Trinity\_Mother\_Frances\_Hospital\_Tyler
- Clear\_Lake\_Regional\_Medical\_Center
- Conroe\_Regional\_Medical\_Center
- Covenant\_Medical\_Center
- Del\_Sol\_Medical\_Center
- 
- ell\_Seton\_Medical\_Center\_at\_the\_University\_of\_Texas
- East\_Texas\_Medical\_Center\_Tyler
- JPS\_Health\_Network\_John\_Peter\_Smith\_Hospital
- Medical\_Center\_Hospital
- Medical\_Center\_of\_Plano
- Memorial\_Hermann\_Hospital\_System\_Houston
- Methodist\_Dallas\_Medical\_Center
- Parkland\_Health\_Hospital\_System
- Scott\_White\_Memorial\_Hospital
- Seton\_Medical\_Center\_Williamson
- St\_Davids\_Round\_Rock\_Medical\_Center
- Texas\_Health\_Harris\_Methodist\_Hospital\_Fort\_Worth
- Texas\_Health\_Presbyterian\_Hospital\_Plano
- Texas\_Health\_Presbyterian\_Hospital\_Dallas
- Texas\_Health\_Presbyterian\_Hospital\_of\_Dallas
- United\_Regional\_Health\_Care\_System
- University\_Health\_System\_San\_Antonio
- University\_Medical\_Center\_Lubbock
- University\_Medical\_Center\_of\_El\_Paso
- University\_of\_Texas\_Medical\_Branch

---

Trauma Center

- Dixie\_Regional\_Medical\_Center
- Intermountain\_Medical\_Center
- McKay\_Dee\_Hospital\_Center
- Ogden\_Regional\_Medical\_Center
- University\_of\_Utah\_Hospital
- Utah\_Valley\_Regional\_Medical\_Center
-

---

Trauma Center

- Carilion\_Roanoke\_Memorial\_Hospital
- Centra\_Lynchburg\_General\_Hospital
- CJW\_Medical\_Center\_Chippenham\_Campus
- Henrico\_Doctors\_Hospital\_Forest
- Inova\_Fairfax\_Hospital
- Mary\_Washington\_Hospital
- Reston\_Hospital\_Center
- Riverside\_Regional\_Medical\_Center
- Sentara\_Norfolk\_General\_Hospital
- University\_of\_Virginia\_Health\_System
- 

- University\_of\_Virginia\_Commonwealth\_University\_Medical\_Center\_Richmond
- Winchester\_Medical\_Center

---

Trauma Center

- The\_University\_of\_Vermont\_Medical\_Center

---

Trauma Center

- Harborview\_Medical\_Center
- Madigan\_Army\_Medical\_Center
- PeaceHealth\_Southwest\_Medical\_Center
- PeaceHealth\_St.\_Joseph\_Medical\_Center
- Providence\_Regional\_Medical\_Center\_Everett
- 

- Sacred\_Heart\_Medical\_Center\_and\_Childrens\_Hospital
- St.\_Joseph\_Medical\_Center
- Tacoma\_General\_Hospital

---

Trauma Center

- Aspirus\_Wausau\_Hospital
- Aurora\_BayCare\_Medical\_Center
- Aurora\_Medical\_Center\_Summit
- Froedtert\_Memorial\_Lutheran\_Hospital
- Gundersen\_Lutheran\_Medical\_Center
- Mayo\_Clinic\_Health\_System\_Eau\_Claire
- Mercy\_Health\_System\_Mercy\_Hospital
- Ministry\_Saint\_Josephs\_Hospital
- St.\_Vincent\_Hospital
- ThedaCare\_Regional\_Medical\_Center\_Neenah
- University\_of\_Wisconsin\_Hospitals\_and\_Clinics

---

Trauma Center

- Cabell\_Huntington\_Hospital\_Tri\_State\_Trauma\_Center
- CAMC\_General\_Hospital
- Ohio\_Valley\_Medical\_Center
- St\_Marys\_Medical\_Center\_Tri\_State\_Trauma\_Center
- 

- niversity\_Hospitals\_Jon\_Michael\_Moore\_Trauma\_Center
- Wheeling\_Hospital

---

Trauma Center

- Cheyenne\_Regional\_Medical\_Center
- Wyoming\_Medical\_Center

---

Trauma Center

- George\_Washington\_University\_Hospital
- Howard\_University\_Hospital
- MedStar\_Washington\_Hospital\_Center

---

Approximately what percentage of penetrating trauma does your center see annually?

- < 5%
- 6-10%
- 11-15%
- 16-20%
- 21-25%
- >25%
- Don't know

---

What governing body accredits your trauma center?

- ACS
- State-level accreditation
- Other

---

What governing body accredits your center?

\_\_\_\_\_

---

How many years has your center been open and accredited?

\_\_\_\_\_

**Utilization of Video Review****Please select the choices that best characterize the use of TVR at your institution**

|                                        | Yes                   | No                    | I don't know          |
|----------------------------------------|-----------------------|-----------------------|-----------------------|
| We currently have a TVR program        | <input type="radio"/> | <input type="radio"/> | <input type="radio"/> |
| We used to have a TVR program          | <input type="radio"/> | <input type="radio"/> | <input type="radio"/> |
| We have future plans for a TVR program | <input type="radio"/> | <input type="radio"/> | <input type="radio"/> |

**QUESTIONS FOR CURRENT USERS**

How long has your center had a TVR program?

- < 1 year  
 1-5 years  
 5-10 years  
 >10 years

Are all trauma resuscitations recorded?

- Yes  
 No  
 I don't know

What proportion of recorded resuscitations are reviewed?

- < 25%  
 25-50%  
 51-75%  
 76-100%  
 I don't know

Who reviews the trauma resuscitation videos?  
(check all that apply)

- Physicians  
 Nurses  
 PI/QI coordinators  
 Research assistants  
 I don't know  
 Other

Please describe who reviews the videos

\_\_\_\_\_

How is feedback from Trauma Video Review provided?  
(check all that apply)

- Educational/Quality Improvement Conference  
 Individual or small group feedback  
 No formal feedback provided, videos available for review on request  
 No formal feedback, videos not available for review  
 Other

Please describe in which setting videos are reviewed

\_\_\_\_\_

In selecting videos for review, what characteristics of the resuscitation are important to highlight?  
(check all that apply)

- Communication  
 Leadership  
 Opportunities for improvement/adverse events  
 Timing/tempo of resuscitation  
 Other

Please describe other important criteria for selection

\_\_\_\_\_

For how long are videos stored?

- < 2 weeks  
 2-4 weeks  
 >4 but < 12 weeks  
 >12 weeks  
 I don't know

How are patients consented for TVR at your center?

- Patients are not consented  
 They are consented as part of a broad "Consent for Treatment" form  
 They are specifically consented for TVR  
 Other

---

How are they consented?

---

**TVR Perceptions**

|                                                                                  | 1                     | 2                     | 3                     | 4                     | 5                     | 6                     | 7                     | 8                     | 9                     | 10                    |
|----------------------------------------------------------------------------------|-----------------------|-----------------------|-----------------------|-----------------------|-----------------------|-----------------------|-----------------------|-----------------------|-----------------------|-----------------------|
| In general, how well perceived is TVR at your program?<br>(1 = Worst, 10 = Best) | <input type="radio"/> |
| How reliable is your TVR technology?<br>(1 = Worst, 10 = Best)                   | <input type="radio"/> |

**How important are each of the following factors in the performance of your TVR program?**

|                                                                       | Not at all important  | Minimally important   | Somewhat important    | Moderately important  | Very important        |
|-----------------------------------------------------------------------|-----------------------|-----------------------|-----------------------|-----------------------|-----------------------|
| Clinical staff resistance or concerns about performance repercussions | <input type="radio"/> |
| Medicolegal concerns from administration                              | <input type="radio"/> |
| Financial Constraints (equipment, maintenance)                        | <input type="radio"/> |
| Resource Constraints (time allocation, reviewers time)                | <input type="radio"/> |
| Technical glitches, reliability                                       | <input type="radio"/> |
| Student/Resident/Faculty/Nursing "buy-in"                             | <input type="radio"/> |



**TVR Legal Questions**

Have you ever encountered any legal issues regarding the use of TVR at your institution? (i.e. administration push back, consenting problems)

- Yes  
 No  
 I don't know

Please explain the issues encountered

---

Have you ever heard of any legal action taken regarding a TVR case either at your institution or another?

- Yes  
 No

Have you ever been told or heard that TVR is a violation of HIPAA?

- Yes  
 No

**QUESTIONS FOR CENTERS THAT STOPPED TVR PROGRAM****How important were the following factors in influencing the cessation of your TVR program?**

|                                                                       | Not at all important  | Minimally important   | Somewhat important    | Moderately important  | Very important        |
|-----------------------------------------------------------------------|-----------------------|-----------------------|-----------------------|-----------------------|-----------------------|
| Clinical staff resistance or concerns about performance repercussions | <input type="radio"/> |
| Medicolegal concerns from administration                              | <input type="radio"/> |
| Financial Constraints (equipment, maintenance)                        | <input type="radio"/> |
| Resource Constraints (time allocation, reviewers time)                | <input type="radio"/> |
| Unclear benefit from a quality improvement perspective                | <input type="radio"/> |
| Poor Student/Resident/Faculty/Nursing "buy-in"                        | <input type="radio"/> |

---

Other reasons why TVR program ceased

---

**QUESTIONS FOR CENTERS PLANNING TO START A TVR PROGRAM****How important are each of the following in regards to developing a TVR program?**

|                                                                       | Not at all important  | Minimally important   | Somewhat important    | Moderately important  | Very important        |
|-----------------------------------------------------------------------|-----------------------|-----------------------|-----------------------|-----------------------|-----------------------|
| Clinical staff resistance or concerns about performance repercussions | <input type="radio"/> |
| Medicolegal concerns from administration                              | <input type="radio"/> |
| Financial Constraints (equipment, maintenance)                        | <input type="radio"/> |
| Resource Constraints (time allocation, reviewers time)                | <input type="radio"/> |
| Technical glitches, reliability                                       | <input type="radio"/> |
| Student/Resident/Faculty/Nursing "buy-in"                             | <input type="radio"/> |

Do you have the hardware already available in your institution to implement a TVR program? (i.e. mounted cameras etc)

- Yes  
 No  
 I don't know

Other concerns about starting a TVR program

---

**QUESTIONS FOR CENTERS NOT PLANNING ON STARTING TVR PROGRAM**

**How important are the following factors in influencing the decision not to establish a TVR program?**

|                                                                       | Not at all important  | Minimally important   | Somewhat important    | Moderately important  | Very important        |
|-----------------------------------------------------------------------|-----------------------|-----------------------|-----------------------|-----------------------|-----------------------|
| Clinical staff resistance or concerns about performance repercussions | <input type="radio"/> |
| Medicolegal concerns from administration                              | <input type="radio"/> |
| Financial Constraints (equipment, maintenance)                        | <input type="radio"/> |
| Resource Constraints (time allocation, reviewerstime )                | <input type="radio"/> |
| Unclear benefit from a quality improvement/educational perspective    | <input type="radio"/> |
| Student/Resident/Faculty/Nursing "buy-in"                             | <input type="radio"/> |
| Technical glitches, reliability                                       | <input type="radio"/> |

Other reasons for not establishing a TVR program

---
